# Supplementary material for: Promoting Effect and Potential Mechanism of Lactobacillus pentosus LPQ1-Produced Active Compounds on the Secretion of 5-Hydroxytryptophan
Source: MDPI journal article supplement (doi:10.3390/foods11233895), 2022-12-02
Supplement: s1 [file s1]

**Table S1. Primer sequences.**

| <b>Target gene</b> | <b>Reverse (5'→3')</b> | <b>Forward (5'→3')</b> |
|--------------------|------------------------|------------------------|
| GAPDH              | TTTGAGGGTGCAGCGAACTT   | ACAGCAACAGGGTGGTGGAC   |
| Atf4               | CCAAGGAGCCGATGAGATAGTT | GACAGGCGGCAACGATACT    |
| Mt-nd2             | GGCGCCAACAAAGACTGATG   | TACCCGAAGTCACCCAAGGA   |
| Mt-nd4             | GTGTGGGAAGGTTGGAGGTT   | GCCAACCTAGCACTACCACC   |
| Mt-nd3             | AGGGGGAGTAGTAAGGCGAT   | GACCCAACAAGTTCTGCACG   |
| Mt-co2             | AAGTGCTGGGCAAAGAATGC   | CTGATGACTGCCCAACTCCC   |
| Ndufv3             | GAGGGGAGCTTTTGGACAGTG  | ATAAAAAGGCGGCAGGACCAA  |
| Mt-nd1             | GAATAGGGCGAATGGTCCTG   | CGAGCTCCCTTCGACTTAAC   |
| Edn1               | GAAACTGTAGAAGCCGGACA   | AGCAACAGCATCAAGACCTC   |
| Socs3              | TCTTCTGCTGGGCTAACTGG   | AACGGTCACCTGGACTCCTAT  |
| Lif                | GTATGGCGCAGGTGGCATT    | ATGAAGGTCTTGGCCACAGG   |

**Table S2. Quality of the RNA-sequence data of each sample. SLPQ1, treatment group after SLPQ1 interacted with RIN-14B cells; Control, control group.**

| Sample    | Raw reads (bp) | Clean reads (bp) | Q20 (%) | Q30 (%) |
|-----------|----------------|------------------|---------|---------|
| Control 1 | 67171142       | 66653124         | 98.18   | 94.43   |
| Control 2 | 64547394       | 64091508         | 98.17   | 94.39   |
| Control 3 | 72493818       | 71963872         | 98.14   | 94.33   |
| SLPQ1     | 66118396       | 65629050         | 98.17   | 94.43   |
| SLPQ2     | 69144106       | 68603916         | 98.08   | 94.19   |
| SLPQ3     | 73645230       | 73126506         | 98.25   | 94.61   |
